# Supplementary material
Source: PubMed Central journal article supplement (PMC2687262)
Supplement: supp_75_11_3803__1.pdf [file supp_75_11_3803__1.pdf]

**TABLE S1. Plasmids and bacterial strains.**

| <b>Strain/plasmid</b> | <b>Relevant genotype or features</b>                                                                                            | <b>Source</b>             |
|-----------------------|---------------------------------------------------------------------------------------------------------------------------------|---------------------------|
| Strains               | Genotype                                                                                                                        |                           |
| BL21(DE3)             | <i>E. coli</i> B F <sup>-</sup> <i>ompT hsdS<sub>B</sub>(r<sub>B</sub><sup>-</sup> m<sub>B</sub><sup>-</sup>) gal dcm</i> (DE3) | (4)                       |
| EN2                   | BL21(DE3) $\Delta$ <i>dnaK::kan</i>                                                                                             | This study                |
| PopC4617              | MC4100 $\Delta$ <i>dnaK::kan</i>                                                                                                | P. Delepelaire            |
| Plasmids              | Features                                                                                                                        |                           |
| pTrc99                | <i>trc</i> promotor containing expression vector                                                                                | Amersham Bioscience       |
| pTrc-DnaK             | <i>E. coli dnaK</i> cloned into the pTrc99 vector                                                                               | This study                |
| pIVEX-CpxP            | <i>E. coli cpxP</i> cloned into the pIVEX2.4d vector                                                                            | M. Miot and J-M. Betton   |
| pET-PA28 $\alpha$     | Rat PA28 $\alpha$ cDNA cloned into the pET16b vector                                                                            | (3)                       |
| pET-ClpP1             | <i>Mycobacterium tuberculosis Rv2461c</i> cloned into the pET22b vector                                                         | M. Ortiz and N. Benaroudj |
| pET-ClpP2             | <i>M. tuberculosis Rv2460c</i> cloned into the pET22b vector                                                                    | M. Ortiz and N. Benaroudj |
| pNB41                 | <i>Methanococcus janaschii s4</i> cloned into the pET14b vector                                                                 | (2)                       |
| pET-GFP               | GFP cDNA cloned into the pET16b vector                                                                                          | (5)                       |
| pRSETa/Nemo           | Murine Nemo cDNA cloned into pRSETa vector                                                                                      | (1)                       |

1. **Agou, F., F. Ye, S. Goffinont, G. Courtois, S. Yamaoka, A. Israel, and M. Veron.** 2002. NEMO trimerizes through its coiled-coil C-terminal domain. *J Biol Chem* **277**:17464-75.
2. **Benaroudj, N., and A. L. Goldberg.** 2000. PAN, the proteasome-activating nucleotidase from archaeobacteria, is a protein-unfolding molecular chaperone. *Nat Cell Biol* **2**:833-9.
3. **Song, X., J. D. Mott, J. von Kampen, B. Pramanik, K. Tanaka, C. A. Slaughter, and G. N. DeMartino.** 1996. A model for the quaternary structure of the proteasome activator PA28. *J Biol Chem* **271**:26410-7.
4. **Studier, F. W., A. H. Rosenberg, J. J. Dunn, and J. W. Dubendorff.** 1990. Use of T7 RNA polymerase to direct expression of cloned genes. *Methods Enzymol* **185**:60-89.
5. **Weber-Ban, E. U., B. G. Reid, A. D. Miranker, and A. L. Horwich.** 1999. Global unfolding of a substrate protein by the Hsp100 chaperone ClpA. *Nature* **401**:90-3.
